# Supplementary material for: Association of circulating microRNA-122 with presence and severity of atherosclerotic lesions
Source: PeerJ. 2018 Jul 4;6:e5218. doi: 10.7717/peerj.5218 (PMC6035718; doi:10.7717/peerj.5218)
Supplement: Supplemental Information 2 [file peerj-06-5218-s002.xlsx]

## Sheet: Sheet1
miR122 of control	miR122 of CHD	Gensini score of control	Gensini score of CHD
1.30518	2.22012	0	35
2.20865	2.43588	12	32
1.00865	2.71231	0	45
1.04818	2.22012	18	31
1.33964	2.35138	8	29
1.39809	2.81231	3	43
1.29232	2.72012	0	40
2.44818	2.25317	12	24
1.43588	2.26369	0	45
2.50669	2.20049	0	32
1.33964	2.54818	9	53
1.30927	2.24818	0	36
1.66094	2.33588	0	40.5
1.64327	2.48688	5	37
1.57906	2.26369	17	40
1.43651	2.40049	6	51
1.64213	2.31231	15	33
1.71222	2.72012	10	43.5
1.61956	2.25317	0	22
1.30749	2.26369	0	40
1.35694	2.20049	13	40
2.21825	2.54818	16	28
1.35138	2.24818	0	54
1.21231	2.26369	19	24
1.32012	2.40049	0	51
1.25317	2.44818	16	40
1.20049	2.6509	0	51
1.26369	2.41825	0	41
1.24818	2.21222	2	45
2.03588	2.01956	12	23
0.706688	2.35694	2	22
1.24818	2.15138	10	33
0.939638	1.13651	16	32
1.17906	1.21825	13	30
1.13651	0.912219	0	45
1.21825	1.10927	17	46
0.912219	1.76094	20	41
1.10927	1.36433	0	37
1.06094	1.86421	7	44
0.964327	2.33651	0	37
0.864213	2.61825	4	52
1.50749	1.2219	2	23
1.61956	1.81956	13.5	28
1.35694	1.60749	0	43
1.56529	2.35694	12.5	22
1.65987	2.65138	16	34
1.46857	2.61231	1.5	43
1.53795	2.62012	18.5	47
1.70921	2.57906	5	52
1.61914	2.33651	14	52.5
1.51825	2.61825	21	44
1.71222	2.12219	0	33
1.70927	2.21956	0	54.5
1.60944	2.60749	2	40
1.60049	2.35694	0	42.5
1.64818	2.10418	17	46
1.74818	1.91956	0	33
1.58944	1.94201	0	45
1.60725	2.24584	0	40.5
1.6261	1.9049	5	37
1.51013	2.10418	0	29
1.71126	2.24584	2	33.5
1.85282	1.91956	17	29
1.70629	2.10418	17	44
1.73052	2.24584	2	30
1.63588	2.10418	20	50
1.82012	2.10418	8	24.5
1.95138	2.24584	20	53
1.81231	2.10418	15	46
1.52012	2.31825	12.5	25
1.70749	1.27906	0	46
1.95694	2.71222	3	41.5
1.91231	2.13651	17	28
1.82012	2.81956	8	53.5
1.75317	2.30749	0	54
1.75138	2.35694	14.5	52
1.56529	2.10418	7	44
1.85987	2.10418	14	40
1.76857	1.91956	0	23.5
1.53795	2.24584	5	34
1.70921	1.10418	3	51
1.61914	2.24584	3	40
1.81825	2.10418	0	50
1.91222	2.24584	3.5	36
1.10927	1.10418	0	24
1.96094	2.27906	3	32
1.94818	2.24584	10	52
1.92012	2.24584	0	49
2.35138	1.80418	1.5	39
1.82012	2.10418	4	30
1.93588	2.10418	3	141
1.81231	1.24584	10	33
1.92012	2.10418	0	144
1.75138	1.91956	14	22
2.41231	1.35694	5	41
1.82012	1.65138	8.5	29
1.85317	1.61231	5	29
1.86369	1.30749	5	78
1.90049	1.62012	3	77
3.44818	2.11825	42	81
	2.11956		68
	2.10418		79
	2.24584		77
1.33964	2.50418		76
1.82012	2.40418		89
	2.24584		65.5
	2.10418		60
	2.31825		76
	2.26369		86
	2.50049		66
	2.53172		60
	2.35138		55
	2.41231		65
	2.27906		82
	2.83651		74
	2.11825		74.5
	2.11956		76.5
	2.10418		77
	2.24584		55
	2.50418		79
	2.40418		80
	2.24584		95
	2.10418		78
	2.31825		92
	2.26369		55
	2.50049		76
	2.53172		64
	2.57906		61
	2.63651		89
	2.41825		84
	1.96094		85
	2.94818		164
	1.92012		77
	2.35138		79
	1.82012		82
	1.93588		76
	1.81231		65
	1.92012		60
	1.75138		61
	2.41231		56
	1.82012		68
	1.5049		78
	1.96369		72
	3.30749		160
	3.62012		165
	2.86369		86
	2.90049		58
	2.75317		57
	2.57906		59
	2.83651		81
	3.11825		80.5
	2.91956		68
	2.10418		75
	2.24584		67
	4.10418		158
	2.40418		67
	2.24584		65
	2.10418		68
	2.31825		62.5
	2.27906		59
	2.71222		66
	2.13651		75
	2.81956		94
	2.30749		87
	2.75694		89
	2.65138		66
	2.61231		58
	2.62012		60
	1.75317		91
	2.50049		91
	2.26369		80
	2.74201		64
	2.5049		59
	2.10418		60
	2.91956		74
	2.24584		79
	2.24584		85
	3.26369		60.5
	3.50049		80
	2.75317		68
	3.57906		57.5
	4.13651		57
	2.91956		58
	2.35694		85
	2.65138		55
	2.61231		62
	3.26369		86.5
	3.50049		91
	2.75317		64
	3.57906		85
	4.13651		72.5
	4.41825		72
	3.81956		75
	3.11825		76
	2.31222		56
	2.41956		68
	4.10418		177
	4.10418		164
	3.62012		81
	3.26369		108.5
	3.50049		116
	2.75317		107.5
	3.57906		107
	4.13651		188
	4.41825		197
	3.81956		208
	3.65138		107.5
	4.91956		198
	3.24584		100
	3.10418		148
	2.62012		109
	3.26369		190
	3.50049		254
	2.75317		156
	3.57906		147
	3.13651		112
	3.81956		148
	3.65138		157
	4.26369		153
	4.20049		192
	4.60749		185
	5.56944		181
	4.24818		156
	4.24818		130
	3.62012		117
	3.26369		96
	3.50049		111
	2.75317		125
	4.57906		135
	3.13651		96
	3.41825		141
	3.81956		207
	3.65138		101
	4.26369		167
	4.20049		114
	4.60749		158
	5.56944		144
	4.24818		111
	4.24818		128
	5.03588		188
	3.26369		105
	4.50049		206
	4.74201		152
	5.61825		138
	6.71222		124
	3.81956		146
	4.65138		232
	4.26369		166
	6.20049		192
	4.60749		140
	5.56944		130.5
	4.24818		196
	4.24818		108.5
	5.03588		169
	6.70049		176
	3.79061		108
	3.53651		168
	4.61825		158
	3.71222		117
	3.81956		106
	4.65138		147
	4.26369		185
	6.20049		160.5
	4.60749		127
	5.56944		154
	4.24818		125.5
	4.24818		124
	5.03588		111
	4.60749		156
	4.56944		176
	5.65138		168
	5.61231		138
	4.62012		106
	5.75317		119
	6.17906		119
	6.13651		174
	4.21825		151
	6.91222		210.5
	6.01956		96
	4.30749		120
	5.35694		96
	6.21231		112
	5.35138		146
	6.22012		224
	7.53964		112
	4.30927		220
	4.96433		116
	3.56094		120
	5.86421		156
	6.70073		120
	8.68489		156
	6.52806		134
	4.68489		134
	7.35138		129.5
	6.5049		184
	7.88489		220
	4.52806		133
	5.9049		166
	6.52806		98.5
	8.35138		170
1.62283	2.61231
0.706688	0.912219
3.44818	8.68489
